# Supplementary material for: Cellulose nanocrystals as stabilizers for waterborne fluorescent non-isocyanate polyurethane latexes
Source: Royal Society of Chemistry journal article supplement (doi:10.1039/d5py00341e), 2025-01-01
Supplement: d5py00341e1.pdf [file d5py00341e1.pdf]

## Supporting information

# Cellulose Nanocrystals as Stabilizers for Waterborne Fluorescent Non-Isocyanate Polyurethane Latexes

Hsin-Chen Chen,<sup>a,b</sup> Gilles Sèbe,<sup>b</sup> Thomas Vidil,<sup>b</sup> Lars. A. Berglund,<sup>c</sup> Audrey Llevot,<sup>b,\*</sup> Qi Zhou,<sup>a,\*</sup> and Henri Cramail<sup>b,\*</sup>

<sup>a</sup> Division of Glycoscience, Department of Chemistry, School of Engineering Sciences in Chemistry, Biotechnology and Health, KTH Royal Institute of Technology, AlbaNova University Centre, SE-106 91 Stockholm, Sweden

<sup>b</sup> CNRS, University Bordeaux, Bordeaux INP, Laboratoire de Chimie des Polymères Organiques, UMR 5629, 33600 Pessac, France

<sup>c</sup> Department of Fibre and Polymer Technology, KTH Royal Institute of Technology, Teknikringen 56, SE-100 44 Stockholm, Sweden.

E-mail: qi@kth.se, henri.cramail@enscbp.fr, audrey.llevot@enscbp.fr

Supporting Information contains 5 pages including 7 Figures.

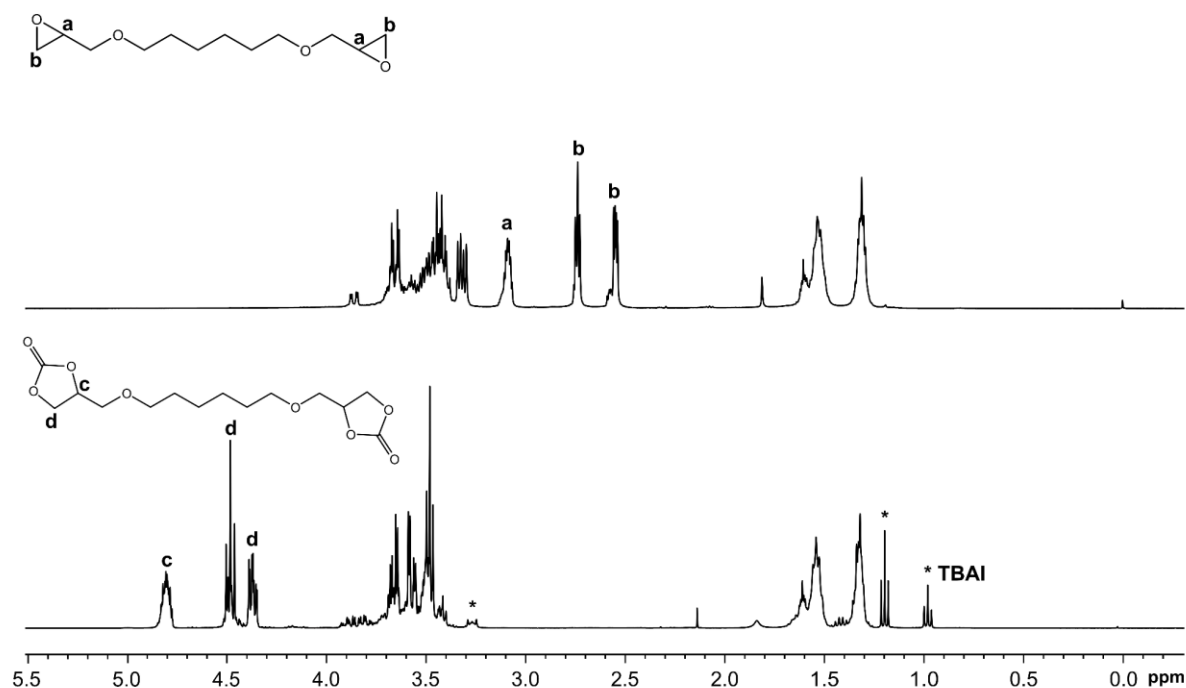

**Fig. S1.**  $^1\text{H}$  NMR spectra of 1,6-hexanediol diglycidyl ether as the starting material and 1,6-hexanediol bis(cyclic carbonate) after  $\text{CO}_2$  carbonation reaction. The samples were dissolved in  $\text{CDCl}_3$ .

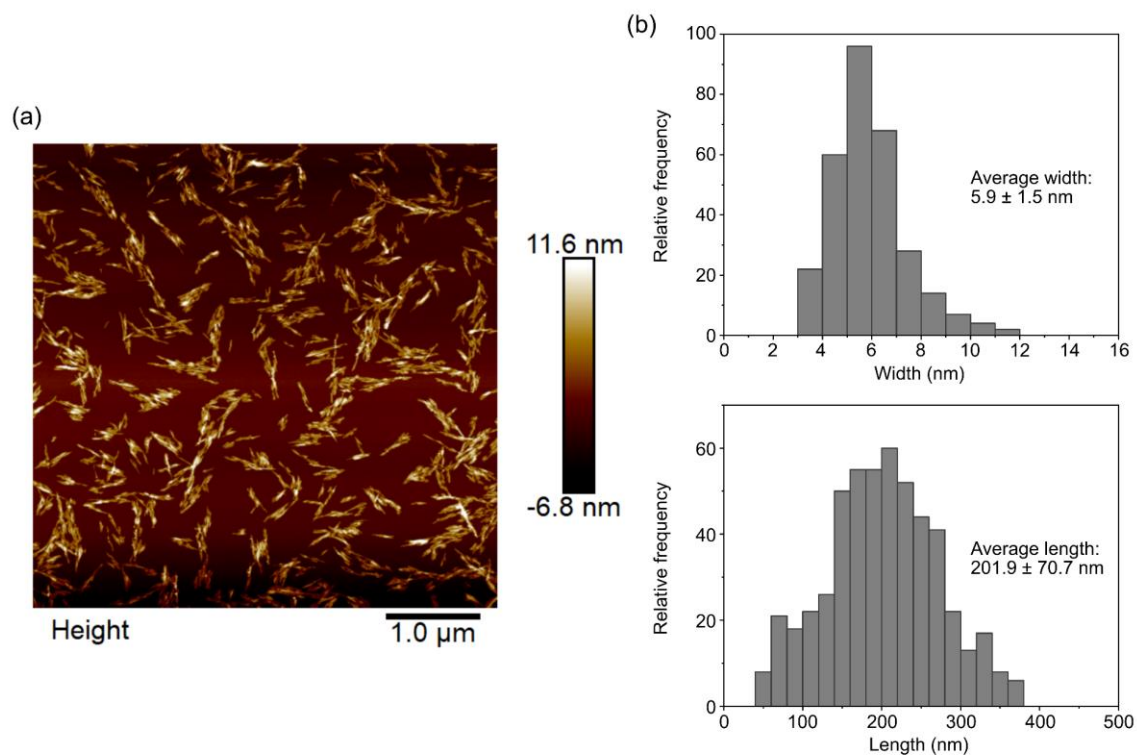

**Fig. S2.** (a) AFM height image of the CNCs, which was deposited on a silicon wafer and dried. (b) Corresponding histograms of the width and length distribution of CNCs.

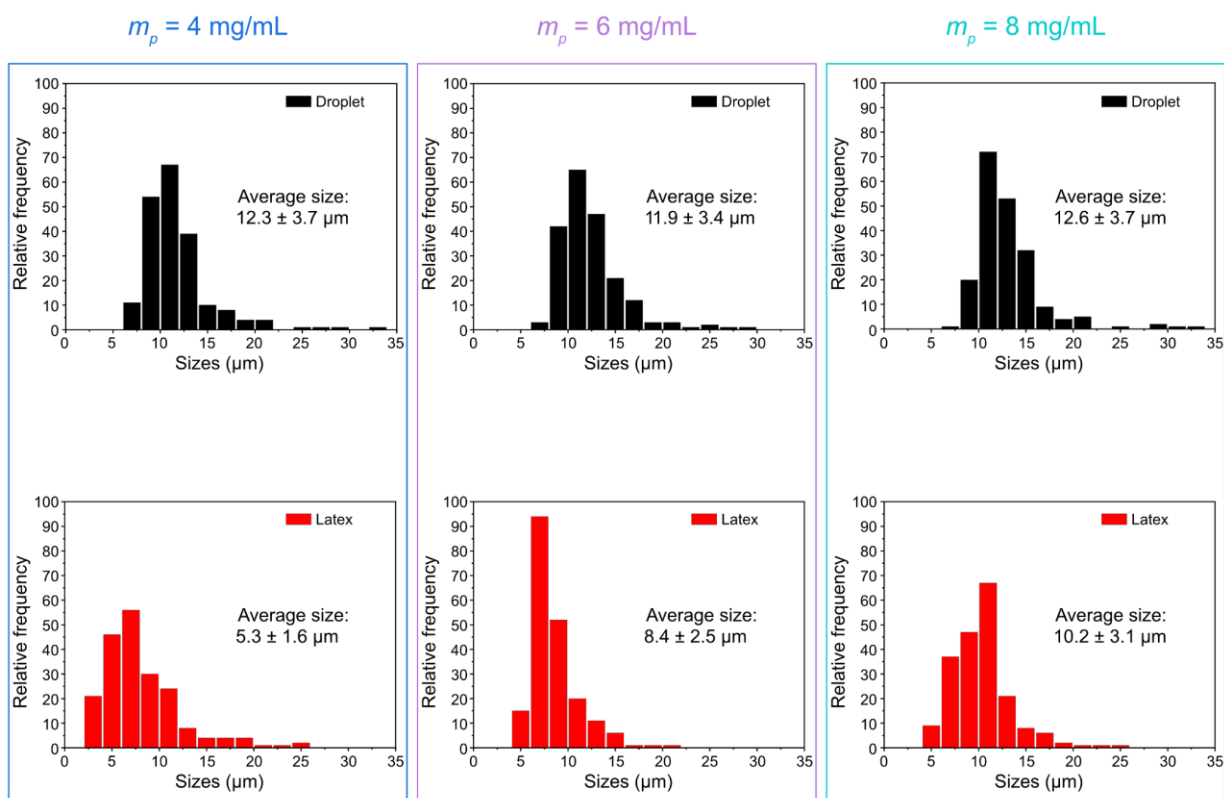

**Fig. S3.** Size histogram of the HCC/siloxane amine emulsion droplets and WNIPU latexes with CNC concentrations ( $m_p$ ) of 4, 6, and 8 mg/mL measured from confocal laser scanning microscopy images.

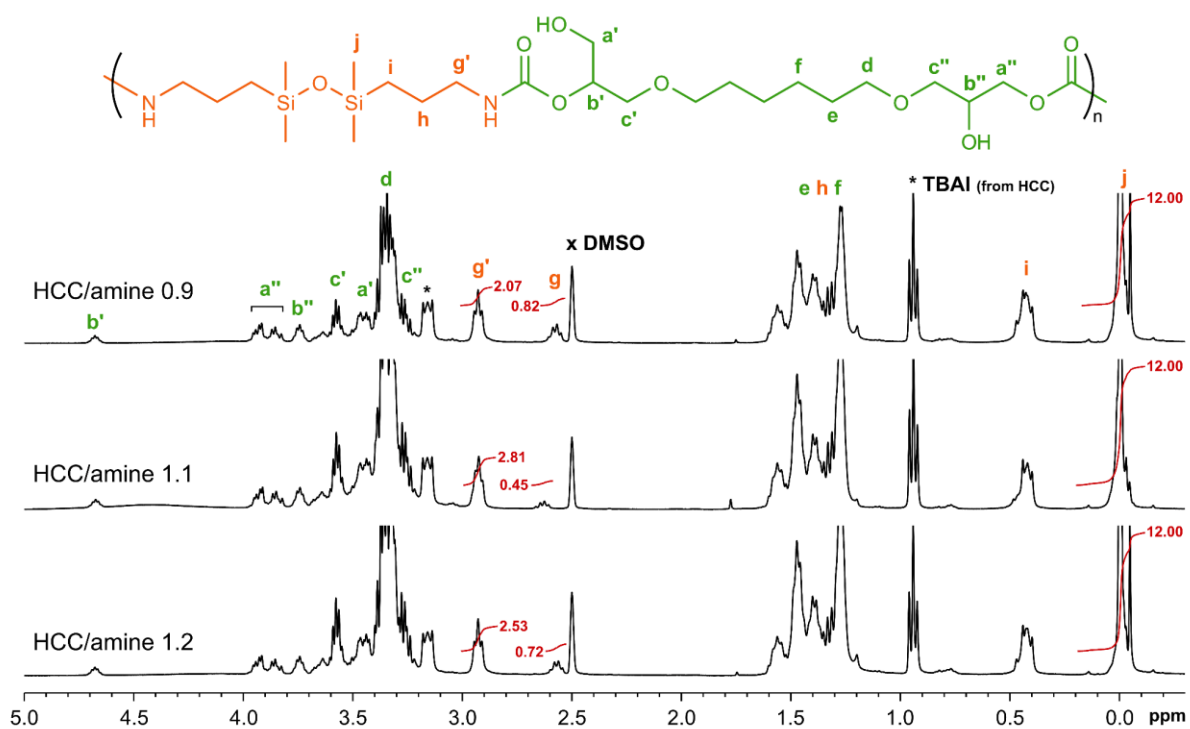

**Fig. S4.**  $^1\text{H}$  NMR spectra of the dried WNIPU latexes in  $\text{DMSO-d}_6$ :  $\text{CDCl}_3$  (1:1 v/v) with varied HCC/amine ratio of 0.9, 1.1, and 1.2.

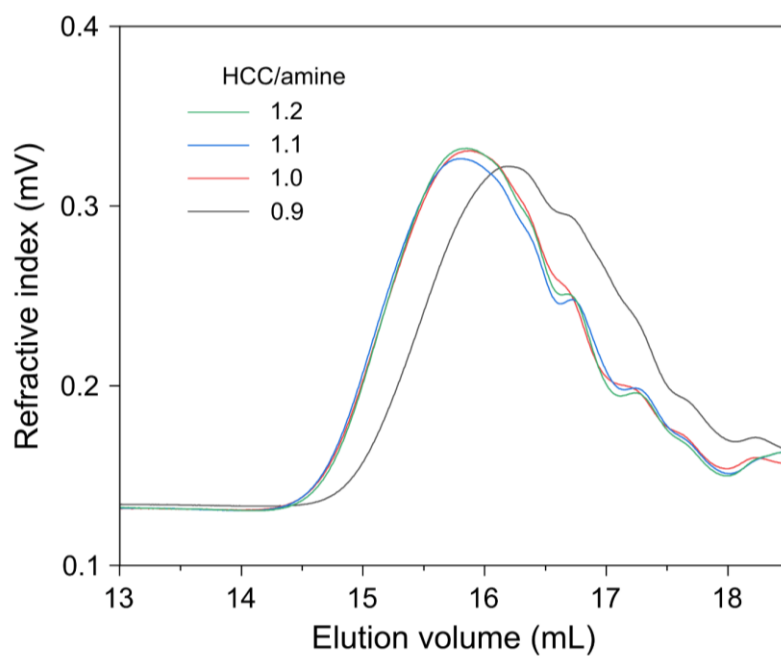

**Fig. S5.** Effect of HCC/amine ratio on molecular weight distribution measured by SEC.

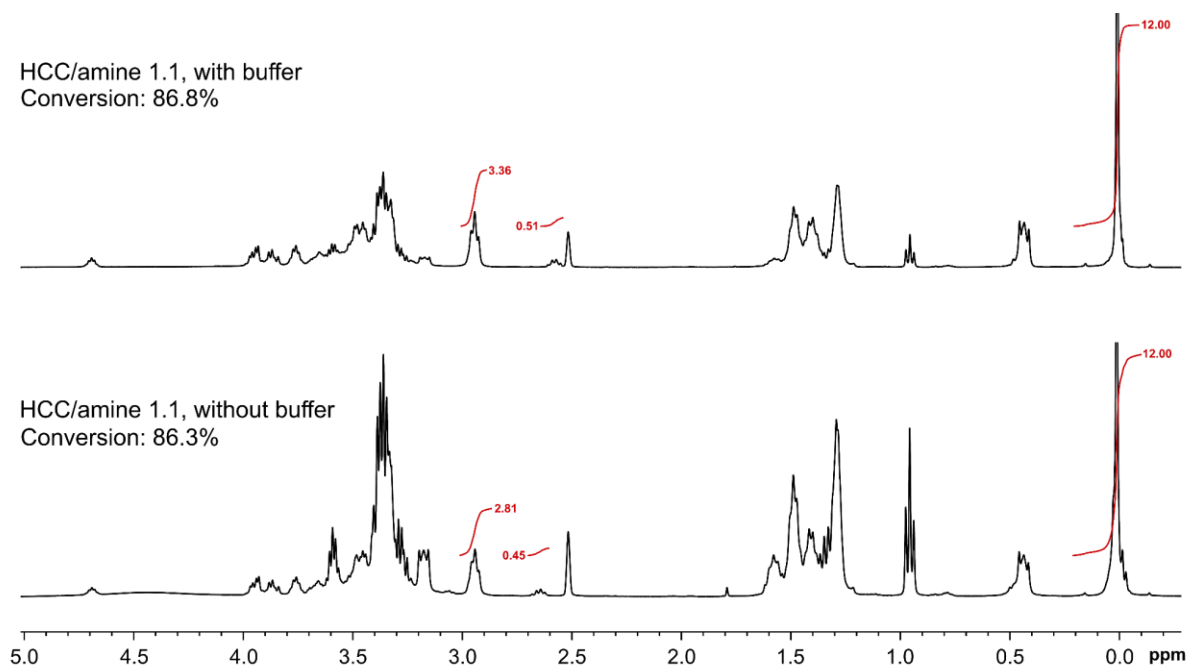

**Fig. S6.**  $^1\text{H}$  NMR spectra of the WNIPU (CC/amine ratio of 1.1) polymerized (a) without and (b) with ammonium hydroxide buffer at pH 10.

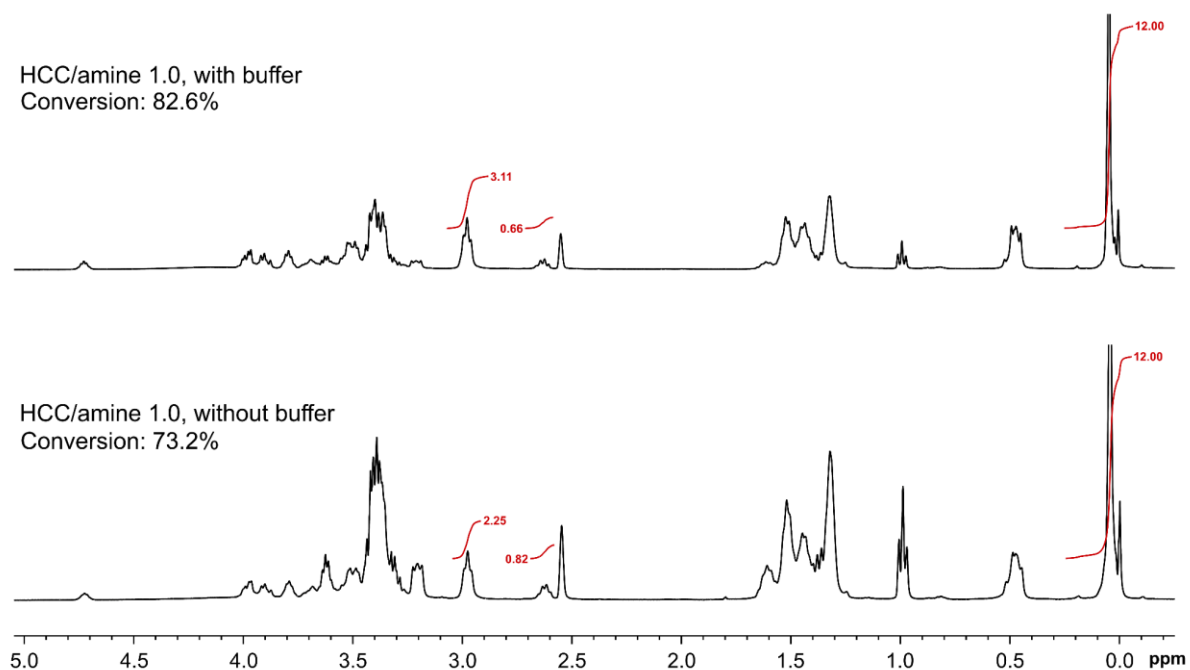

**Fig. S7.**  $^1\text{H}$  NMR spectra of the WNIPU (CC/amine ratio of 1.0) polymerized (a) without and (b) with ammonium hydroxide buffer at pH 10.
